# Supplementary material for: Paediatric Histoplasmosis 2000–2019: A Review of 83 Cases
Source: MDPI journal article supplement (doi:10.3390/jof7060448), 2021-06-04
Supplement: s1 [file s1]

**Table S1.** Details of 83 paediatric histoplasmosis cases included in this review.

| Ref | Country | Age (yrs) | Sex | Disseminated/Single Organ Disease | Organs Effected                    | Underlying condition | Signs and Symptoms                                                           | Diagnostic Technique | Specimens Used for Diagnosis               | Treatment        | Outcome                        |
|-----|---------|-----------|-----|-----------------------------------|------------------------------------|----------------------|------------------------------------------------------------------------------|----------------------|--------------------------------------------|------------------|--------------------------------|
| 17  | US      | 3m        | M   | Disseminated                      | Bone marrow                        | -                    | Fever<br>HSM                                                                 | Histopathology       | Bone marrow                                | AmB + Itra       | Improved                       |
|     |         |           |     |                                   |                                    |                      |                                                                              | Ag Detection         | Serum<br>Urine                             |                  |                                |
| 18  | India   | 11        | M   | Disseminated                      | Lymph-nodes                        | HIV                  | Fever<br>Abdominal pain<br>Vomiting                                          | Histopathology       | Lymph Node<br>Bone marrow                  | AmB              | Death                          |
|     |         |           |     |                                   | Bone marrow                        |                      |                                                                              | Culture              | Lymph Node<br>Bone marrow                  |                  |                                |
| 19  | US      | 16        | M   | Disseminated                      | Lungs                              | HIV<br>Tx-Kidney     | Fever<br>Cough<br>Malaise<br>Vomiting<br>Weight Loss<br>Respiratory distress | Microscopy           | BAL                                        | AmB + Itra       | Improved                       |
|     |         |           |     |                                   | Bone marrow                        |                      |                                                                              | Ag Detection         | Urine<br>Serum                             |                  |                                |
|     | US      | 11        | F   | Disseminated                      | Lungs                              | Tx-Kidney            | Fever<br>Cough<br>Headache<br>Splenomegaly                                   | Ag Detection         | Urine                                      | Itra + Vori      | Recurrence (compliance issues) |
|     | US      | 16        | F   | Disseminated                      | Pericard<br>Lungs<br>Bone marrow   | Tx-Kidney            | Fever<br>Diarrhoea<br>Vomiting<br>Weight loss<br>Respiratory Distress        | Ag Detection         | Pericardial fluid<br>BAL<br>Urine<br>Serum | AmB + Itra       | Lost to Follow Up              |
|     | US      | 11        | F   | Disseminated                      | Lungs<br>Bone marrow               | Tx-Kidney            | Fever<br>Fatigue<br>Cough<br>Abdominal pain<br>Weight loss                   | Microscopy           | BAL                                        | AmB + Itra       | Not specified                  |
|     |         |           |     |                                   |                                    |                      |                                                                              | Ag Detection         | Urine                                      |                  |                                |
|     |         |           |     |                                   |                                    |                      |                                                                              | Ab Detection (CF)    | Serum                                      |                  |                                |
| 20  | India   | 15        | M   | Disseminated                      | Lung<br>Lymph nodes<br>Bone marrow | Tx-Kidney            | Fever<br>Cough<br>Malaise<br>Abdominal Pain<br>Chest pain<br>Splenomegaly    | Histopathology       | Lymph Node<br>Bone marrow                  | AmB+ Itra + Vori | Cure                           |
| 21  | Brazil  | 13        | M   | Disseminated                      | Lung<br>Lymph-nodes                | Not specified        | Cough<br>Lymphadenopathy                                                     | Ag Detection         | Serum                                      | Itra             | Improved                       |
| 22  | India   | 13        | M   | Disseminated                      | Bone<br>CNS<br>Lymph-nodes         | Not Specified        | Fever<br>Anorexia<br>Lymphadenopathy<br>HSM<br>Weight loss                   | Histopathology       | Bone (skull + tibia)                       | AmB + Itra       | Cure                           |
|     |         |           |     |                                   |                                    |                      |                                                                              | Culture              | Bone (skull + tibia)                       |                  | Treatment ongoing              |

|    |          |    |   |              |                                                   |                                                               |                                                                                                        |                                   |                              |            |                                   |
|----|----------|----|---|--------------|---------------------------------------------------|---------------------------------------------------------------|--------------------------------------------------------------------------------------------------------|-----------------------------------|------------------------------|------------|-----------------------------------|
| 23 | US       | 6m | F | Disseminated | Lung<br>Bone<br>Marrow                            | HLH                                                           | Fever<br>Lethargy<br>HSM<br>Respiratory distress                                                       | Histopathology                    | Bone marrow                  | AmB        | Cure<br><br>Treatment ongoing     |
|    |          |    |   |              |                                                   |                                                               |                                                                                                        | Ag Detection                      | Serum<br>Urine<br>CSF        |            |                                   |
|    |          |    |   |              |                                                   |                                                               |                                                                                                        | Ab Detection (ID)                 | Serum                        |            |                                   |
| 24 | Nepal    | 14 | M | Disseminated | Lung<br>Skin                                      | Rheumatic<br>Heart<br>Disease                                 | Fever<br>Cough<br>HSM<br>Skin lesions<br>Weight loss                                                   | Histopathology                    | Lung<br>Skin                 | AmB + Itra | Improved<br><br>Treatment ongoing |
| 25 | US       | 10 | M | Disseminated | Lung<br>Skin<br>Bone<br>marrow                    | HIES<br>(STAT-3 def)                                          | Fever<br>Abdominal pain<br>Skin lesions                                                                | Microscopy                        | BAL                          | AmB + Posa | Improved                          |
|    |          |    |   |              |                                                   |                                                               |                                                                                                        | Ag Detection                      | Serum<br>Urine               |            | Treatment ongoing                 |
|    | US       | 13 | F | Disseminated | GI                                                | HIES<br>(STAT-3 def)                                          | Abdominal pain<br><br>Weight loss                                                                      | Histopathology                    | GI Tissue                    | AmB + Itra | Improved                          |
|    |          |    |   |              |                                                   |                                                               |                                                                                                        | Culture                           | GI Tissue                    |            | Treatment ongoing                 |
|    |          |    |   |              |                                                   |                                                               |                                                                                                        | Ag Detection                      | Urine                        |            |                                   |
| 26 | India    | 7  | F | Disseminated | Bone<br>marrow<br>Lymph<br>nodes<br>Skin<br>Lungs | -                                                             | Fever<br>Ostalgia<br>Weight loss<br>HSM<br>Respiratory distress                                        | Histopathology                    | Lymph Node<br>Bone marrow    | AmB        | Death                             |
|    |          |    |   |              |                                                   |                                                               |                                                                                                        | Culture                           | Bone marrow<br>Skin<br>Blood |            |                                   |
|    |          |    |   |              |                                                   |                                                               |                                                                                                        | Gene Sequencing                   | Skin                         |            |                                   |
| 27 | US       | 13 | M | Disseminated | Lymph                                             | Crohn's<br>Disease                                            | Lymphadenopathy                                                                                        | Serology (Ab/Ag<br>not specified) | Not Specified                | Itra       | Cure                              |
| 28 | Colombia | 7  | M | Laryngeal    | Larynx                                            | Tx-Kidney                                                     | Diarrhoea<br>Odynophagia<br>Tonsillitis<br>Anorexia<br>Headache<br>Fever<br>Stridor<br>Lymphadenopathy | Ab Detection (ID)                 | Serum                        | AmB + Itra | Cure                              |
|    |          |    |   |              |                                                   |                                                               |                                                                                                        | Histopathology                    | Epiglottis biopsy            |            |                                   |
| 29 | India    | 17 | M | Disseminated | Bone<br>Soft Tissue                               | Previous<br>MTB<br><br>Common<br>Variable<br>Immunodeficiency | Arthralgia<br>Joint swelling<br>Abdominal pain<br>Ascites<br>Fever<br>Weight loss<br>HSM               | Microscopy                        | Joint Aspirate               | AmB + Itra | Cure                              |
| 30 | US       | 6  | M | Disseminated | CNS                                               | EBV                                                           | Fever<br>Nausea<br>Abdominal pain<br>Headache<br>Phonophobia                                           | Ag Detection                      | Urine<br>CSF                 | AmB + Itra | Not Specified                     |
|    |          |    |   |              |                                                   |                                                               |                                                                                                        | Ab Detection (CF)                 | Serum                        |            |                                   |

|    |         |     |   |              |                                     |                   |                                                                            |                          |                           |                     |                                         |
|----|---------|-----|---|--------------|-------------------------------------|-------------------|----------------------------------------------------------------------------|--------------------------|---------------------------|---------------------|-----------------------------------------|
|    |         |     |   |              |                                     |                   | Photophobia                                                                |                          |                           |                     |                                         |
| 31 | US      | 8   | M | Pulmonary    | Lungs                               | Not Specified     | Fever<br>Cough<br>Abdominal pain                                           | Ag Detection             | Serum                     | Itra                | Cure                                    |
|    |         |     |   |              |                                     |                   |                                                                            | Ab Detection (CF)        | Serum                     |                     |                                         |
|    | US      | 5   | F | Pulmonary    | Lungs                               | Not Specified     | Fever<br>Cough<br>Abdominal pain                                           | Ag Detection             | Serum                     | Itra                | Cure                                    |
|    |         |     |   |              |                                     |                   |                                                                            | Ab Detection (CF)        | Serum                     |                     |                                         |
| 32 | Nigeria | 13  | F | Disseminated | CNS<br>Lungs<br>Lymph nodes         | Not Specified     | Lymphadenopathy<br>Oliguria<br>Seizures<br>Respiratory distress<br>Ascites | Histopathology           | Lymph Node                | No treatment        | Death                                   |
| 33 | US      | 17  | M | Disseminated | Lymph-nodes                         | EBV               | Fatigue<br>Night-sweats<br>Headaches<br>Weight loss<br>Lymphadenopathy     | Histopathology           | Lymph node                | Itra                | Not Specified                           |
| 34 | US      | 6   | M | CNS          | CNS                                 | -                 | Headache<br>Reduced mobility<br>Facial droop<br>Slurred speech             | Culture                  | CSF                       | AmB + Itra          | Cure                                    |
|    |         |     |   |              |                                     |                   |                                                                            | Ab Detection (CF)        | CSF<br>Serum              |                     |                                         |
|    |         |     |   |              |                                     |                   |                                                                            | Ag Detection             | CSF<br>Serum              |                     |                                         |
| 35 | India   | 5   | F | Disseminated | Bone marrow                         | Not Specified     | Abdominal distention<br>Petechiae                                          | Histopathology           | Bone marrow               | AmB                 | Improved                                |
|    |         |     |   |              |                                     |                   |                                                                            | Serology (not specified) | Not Specified             |                     |                                         |
| 36 | US      | 12  | F | Disseminated | Lung<br>Lymph-nodes                 | Not Specified     | Neck and shoulder pain<br>Chest pain<br>SOB                                | Histopathology           | Lymph node<br>Lung Tissue | AmB + Itra          | Recurrence                              |
|    |         |     |   |              |                                     |                   |                                                                            | Ab Detection (CF+ID)     | Serum                     |                     |                                         |
| 37 | US      | 4m  | F | Disseminated | Bone marrow                         | -                 | Fever<br>HSM                                                               | Ag Detection             | Urine                     | AmB + Itra          | Not Specified                           |
| 38 | US      | 17  | M | Disseminated | Liver<br>Bone marrow<br>Lymph-nodes | STAT1 mutation    | Lymphadenopathy<br>Fever<br>Weight loss                                    | Not specified            | Not specified             | Not specified       | Recurrence                              |
|    | US      | 7   | F | Disseminated | Lymph-nodes<br>Lung                 | STAT1 mutation    | Fever<br>HSM<br>Lymphadenopathy<br>SOB                                     | Not specified            | Not specified             | Itra                | Recurrence                              |
| 39 | Brazil  | 13  | F | Pulmonary    | Lung                                | Lymphoma          | Not specified                                                              | Histopathology           | Lung                      | Itra                | Improved                                |
|    |         | 13  | M | Pulmonary    | Lung                                | -                 | Not specified                                                              | Histopathology           | Lung                      | Itra                | Improved                                |
| 40 | China   | 11  | M | Osseous      | Bone                                | -                 | Bone/joint swelling<br>Skin nodule                                         | Histopathology           | Bone                      | Debridement<br>Vori | Cure                                    |
| 41 | US      | 17m | M | Disseminated | Lung<br>Bone marrow                 | T-cell deficiency | Fever                                                                      | Histopathology           | Bone marrow               | AmB                 | Improved<br>Persistently elevated urine |

|    |               |    |   |              |                  |                                     |                                                                                                                                                           |                   |                         |                                       |                   |
|----|---------------|----|---|--------------|------------------|-------------------------------------|-----------------------------------------------------------------------------------------------------------------------------------------------------------|-------------------|-------------------------|---------------------------------------|-------------------|
|    |               |    |   |              |                  |                                     |                                                                                                                                                           | Microscopy        | BAL                     |                                       | Ag                |
|    |               |    |   |              |                  |                                     |                                                                                                                                                           | Ag Detection      | Urine                   |                                       |                   |
| 42 | Brazil        | 14 | F | Disseminated | Lung Lymph-nodes | Juvenile SLE                        | Cough<br>Abdominal Pain<br>Fever<br>Diarrhoea<br>Vomiting<br>Impetigo<br>HSM                                                                              | Histopathology    | Lymph node              | AmB                                   | Death             |
|    |               |    |   |              |                  |                                     |                                                                                                                                                           | Culture           | GI Tissue<br>Lymph node |                                       |                   |
|    |               |    |   |              |                  |                                     |                                                                                                                                                           | Ab Detection (ID) | Serum                   |                                       |                   |
| 43 | Guinea-Bissau | 12 | M | Disseminated | Lung Lymph-nodes | -                                   | Lymphadenopathy with cutaneous fistulas                                                                                                                   | Culture           | Lymph node              | AmB + Itra + Posa                     | Cure              |
| 44 | India         | 4  | F | Disseminated | GI Lymph-nodes   | HIES                                | Fever<br>Abdominal pain<br>Diarrhoea<br>Weight loss<br>Lymphadenopathy<br>HSM                                                                             | Histopathology    | GI Tissue               | Antibiotics                           | Improved          |
| 45 | US            | 6m | M | Disseminated | Bone marrow      | -                                   | Fever<br>HSM                                                                                                                                              | Histopathology    | Bone Marrow             | AmB + Itra                            | Cure              |
|    |               |    |   |              |                  |                                     |                                                                                                                                                           | Ag Detection      | Urine<br>Serum          |                                       |                   |
|    |               |    |   |              |                  |                                     |                                                                                                                                                           | Ab Detection (CF) | Serum                   |                                       |                   |
| 46 | US            | 13 | F | CNS          | CNS              | -                                   | Confusion<br>Headaches<br>Neck Pain<br>Back Pain<br>Abdominal pain<br>Hearing loss<br>Facial Numbness<br>Slurred Speech<br>Fever<br>Altered mental status | Ag Detection      | Blood<br>CSF            | AmB + Itra                            | Improved          |
|    |               |    |   |              |                  |                                     |                                                                                                                                                           | Ab Detection (ID) | Serum                   |                                       | Treatment ongoing |
| 47 | US            | 8  | M | Pulmonary    | Lung             | Not Specified                       | Wheeze                                                                                                                                                    | Histopathology    | Lung tissue             | Itra                                  | Not Specified     |
|    | US            | 4  | M | Pulmonary    | Lung             | Wilms tumour<br>Chemotherapy        | None (incidental finding)                                                                                                                                 | Histopathology    | Lung tissue             | Antifungal (not specified + resection | Not Specified     |
| 48 | US            | 16 | M | Disseminated | Lung Lymph nodes | Idiopathic chronic anterior uveitis | Fever<br>Night sweats<br>Cough<br>Headache<br>Dysphagia<br>Lymphadenopathy<br>Chest Pain                                                                  | Ab Detection (CF) | Serum                   | AmB + Itra                            | Cure              |
|    |               |    |   |              |                  |                                     |                                                                                                                                                           | Ag Detection      | Urine                   |                                       |                   |
| 49 | Us            | 12 | M | Pulmonary    | Lung             | -                                   | Cough<br>Fever<br>Chest pain                                                                                                                              | Histopathology    | Lung Tissue             | AmB + Itra                            | Cure              |
|    |               |    |   |              |                  |                                     |                                                                                                                                                           | Ab Detection (ID) | Serum                   |                                       |                   |
|    |               |    |   |              |                  |                                     |                                                                                                                                                           | Ag Detection      | Pleural Fluid           |                                       |                   |

|    |                            |     |   |              |                     |                 |                                                                                             |                              |                |               |                                               |
|----|----------------------------|-----|---|--------------|---------------------|-----------------|---------------------------------------------------------------------------------------------|------------------------------|----------------|---------------|-----------------------------------------------|
| 50 | Brazil                     | 13  | M | Pulmonary    | Lung                | Not Specified   | Fever<br>Headache<br>Myalgia<br>Malaise                                                     | Serology (not specified)     | Not specified  | Not specified | Improved<br>Persistent pulmonary nodule on CT |
| 51 | India                      | 3   | - | Disseminated | Skin                | -               | Skin lesions<br>HSM<br>Mouth ulceration                                                     | Histopathology               | Skin           | AmB + Itra    | Recurrence                                    |
| 52 | US                         | 16  | F | Disseminated | Lung<br>Lymph-nodes | Crohn's Disease | Abdominal Pain<br>Fatigue<br>Anorexia<br>Nausea<br>Headache<br>Myalgia<br>Dysuria<br>SOB    | Ag Detection                 | Serum<br>Urine | Itra          | Cure                                          |
|    | US                         | 14  | F | Pulmonary    | Lung                | Crohn's Disease | Fever<br>Headache<br>Myalgia<br>Arthralgia<br>Cough<br>Anorexia<br>Weight loss<br>Dizziness | Serology (not specified)     | Not specified  | AmB + Itra    | Cure                                          |
|    | US                         | 13  | M | Pulmonary    | Lung                | Crohn's Disease | Fever<br>Malaise                                                                            | Serology (not specified)     | Serum<br>Urine | AmB + Itra    | Lost to Follow Up                             |
|    | US                         | 15  | F | Disseminated | Lung<br>Lymph-nodes | Crohn's Disease | Fever<br>Abdominal pain<br>Cough<br>Fatigue                                                 | Ab Detection (not specified) | Serum          | AmB + Itra    | Improved<br><br>Persistent urine Ag positive  |
|    |                            |     |   |              |                     |                 |                                                                                             | Ag Detection                 | Serum<br>Urine |               |                                               |
| 53 | India                      | 16  | F | Disseminated | Skin<br>Bone        | AIDS            | Fever<br>Diarrhoea<br>Skin lesions<br>Lymphadenopathy<br>HSM<br>Weight loss                 | Histopathology               | Bone marrow    | AmB           | Death                                         |
| 54 | US                         | 8   | M | Disseminated | Lung<br>Lymph-nodes | Crohn's Disease | Fever<br>Night sweats<br>Cough<br>Anorexia<br>Abdominal pain<br>Diarrhoea<br>HSM            | Culture                      | Lymph Node     | Itra          | Cure                                          |
|    |                            |     |   |              |                     |                 |                                                                                             | Ag Detection                 | Urine          |               |                                               |
|    |                            |     |   |              |                     |                 |                                                                                             | Ab Detection (CF)            | Serum          |               |                                               |
| 55 | US (mother from Guatemala) | 4wk | F | Disseminated | Skin                | HIV             | Fever<br>Skin rash<br>Respiratory distress<br>Seizures                                      | Culture                      | CSF            | AmB + Itra    | Cure                                          |
|    |                            |     |   |              | Lung                |                 |                                                                                             | Ag Detection                 | Urine          |               |                                               |
|    |                            |     |   |              | CNS                 |                 |                                                                                             | Microscopy                   | CSF            |               |                                               |

|    |                           |    |   |              |                     |                       |                                                                                     |                              |               |                   |               |
|----|---------------------------|----|---|--------------|---------------------|-----------------------|-------------------------------------------------------------------------------------|------------------------------|---------------|-------------------|---------------|
|    | – vertical transmissi on) |    |   |              |                     |                       | Hepatomegaly                                                                        |                              |               |                   |               |
| 56 | US                        | 15 | F | Disseminated | Lung Lymph-nodes    | GIST Chemotherapy     | Fever Cough                                                                         | Ab Detection (CF+ID)         | Serum         | No treatment      | Cure          |
| 57 | US                        | 8  | F | Unclear      | Unclear             | Juvenile RA           | Not specified                                                                       | Ab Detection (not specified) | Serum         | AmB + Itra        | Cure          |
|    |                           |    |   |              |                     |                       |                                                                                     | Ag Detection                 | Not specified |                   |               |
|    |                           | 10 | F | Unclear      | Unclear             | Juvenile RA           | Fever                                                                               | Ab Detection (not specified) | Serum         | AmB + Itra        | Cure          |
|    |                           |    |   |              |                     |                       |                                                                                     | Ag Detection                 | Not specified |                   |               |
|    |                           | 17 | F | Unclear      | Unclear             | Juvenile RA           | Fever                                                                               | Ab Detection (not specified) | Serum         | AmB + Itra        | Cure          |
|    |                           |    |   |              |                     |                       |                                                                                     | Ag Detection                 | Not specified |                   |               |
|    |                           | 13 | F | Unclear      | Unclear             | Juvenile RA Psoriasis | Fever                                                                               | Ab Detection (not specified) | Serum         | AmB + Itra        | Cure          |
|    |                           |    |   |              |                     |                       |                                                                                     | Ag Detection                 | Not specified |                   |               |
|    |                           | 16 | M | Unclear      | Unclear             | Uveitis               | Not specified                                                                       | Ab Detection (not specified) | Serum         | AmB + Itra        | Cure          |
|    |                           |    |   |              |                     |                       |                                                                                     | Ag Detection                 | Not Specified |                   |               |
| 58 | India                     | 6  | F | Disseminated | Lung Bone marrow    | Not Specified         | Fever Cough Abdominal pain Oedema HSM                                               | Histopathology               | Bone marrow   | Not specified     | Not specified |
|    |                           | 1  | M | Disseminated | Bone marrow         | HIV                   | Fever Night sweats Abdominal distention Oedema Weight loss Anorexia Malaise Myalgia | Histopathology               | Bone marrow   | Not specified     | Not specified |
| 59 | US                        | 14 | F | Disseminated | Lung GI Lymph-nodes | HIES                  | Abdominal pain Fever Weight loss Fatigue Cough                                      | Histopathology               | GI Tissue     | Itra              | Cure          |
|    |                           |    |   |              |                     |                       |                                                                                     | Ag Detection                 | Urine         |                   |               |
|    |                           |    |   |              |                     |                       |                                                                                     | Ab Detection (CF +ID)        | Serum         |                   |               |
| 60 | US                        | 15 | F | Disseminated | Not specified       | Sarcoidosis Tx-Kidney | Fever Multi-organ failure                                                           | Autopsy                      | Not specified | No treatment      | Death         |
| 61 | US                        | 5m | M | Pulmonary    | Lung                | -                     | SOB                                                                                 | Ab Detection (CF + ID)       | Serum         | Itra              | Cure          |
|    |                           |    |   |              |                     |                       |                                                                                     | Ag Detection                 | Urine         |                   |               |
| 62 | Brazil                    | 13 | M | Disseminated | Skin                | AML                   | Skin nodules                                                                        | Histopathology               | Skin          | AmB + Itra + Fluc | Cure          |
| 63 | US                        | 15 | F | Disseminated | Lung                | Tx-Kidney             | Not specified                                                                       | Ag Detection                 | Serum         | Itra + Vori       | Improved      |

|    |                                  |    |   |              |                              |                                        |                                                                |                        |                  |                   |                                                                    |
|----|----------------------------------|----|---|--------------|------------------------------|----------------------------------------|----------------------------------------------------------------|------------------------|------------------|-------------------|--------------------------------------------------------------------|
|    |                                  |    |   |              |                              |                                        |                                                                |                        | Urine            |                   |                                                                    |
| 64 | Africa                           | 10 | F | Disseminated | Skin Lymph-nodes             | -                                      | Skin lesions Lymphadenopathy                                   | Histopathology         | Lymph node       | AmB               | Improved Residual Skin Lesions                                     |
|    |                                  |    |   |              |                              |                                        |                                                                | Ab Detection (ID)      | Serum            |                   |                                                                    |
| 65 | Pakistan                         | 5  | M | Disseminated | Lymph-nodes                  | Not Specified                          | Fever Weight loss                                              | Histopathology         | Lymph node       | Not specified     | Not specified                                                      |
| 66 | US                               | 8m | F | Disseminated | Lungs Bone marrow            | -                                      | Fever Cough HSM                                                | Histopathology         | Bone marrow      | AmB + Itra        | Cure                                                               |
|    |                                  |    |   |              |                              |                                        |                                                                | Ag Detection           | Urine            |                   |                                                                    |
|    |                                  |    |   |              |                              |                                        |                                                                | Ab Detection (ID)      | Serum            |                   |                                                                    |
|    |                                  |    |   |              |                              |                                        |                                                                | Culture                | Blood            |                   |                                                                    |
| 67 | France (Recent Travel to Africa) | 2  | F | Disseminated | Skin Bone                    | HIV                                    | Frontal Bone Swelling Fever Weakness                           | Histopathology         | Skin Bone        | AmB + Itra + Fluc | Improved                                                           |
|    |                                  |    |   |              |                              |                                        |                                                                | Culture                | Skin             |                   |                                                                    |
| 68 | US                               | 7  | F | Disseminated | Lung Lymph-nodes             | Juvenile RA                            | Fever Sore throat Weight loss Splenomegaly                     | Histopathology         | Lymph Node       | Itra              | Improved Persistent symptoms                                       |
|    |                                  |    |   |              |                              |                                        |                                                                | Ag Detection           | Urine            |                   |                                                                    |
| 69 | US                               | 11 | F | Disseminated | Lung Skin Lymph-nodes        | HIV                                    | Weight Loss Cough Skin Lesions Lymphadenopathy HSM             | Histopathology         | Skin             | AmB               | Death                                                              |
| 70 | Venezuela                        | 3m | M | Disseminated | Lung Lymph-nodes             | Not Specified                          | Fever SOB Jaundice                                             | Histopathology         | Lymph node       | No treatment      | Death                                                              |
|    |                                  |    |   |              |                              |                                        |                                                                | Culture                | Lymph Node       |                   |                                                                    |
| 71 | US                               | 3  | M | Disseminated | Lung Bone marrow Lymph-nodes | Interferon-gamma receptor-1 Deficiency | Fever HSM Lymphadenopathy                                      | Ab Detection (ID + CF) | Serum            | AmB + Keto        | Recurrence                                                         |
|    |                                  |    |   |              |                              |                                        |                                                                | Culture                | BAL Bone marrow  |                   |                                                                    |
| 72 | Africa                           | 17 | M | Disseminated | Skin Bone Soft Tissue        | Not Specified                          | Skin ulceration Pharyngeal fistula                             | Histopathology         | Bone Soft tissue | AmB               | Cure                                                               |
| 73 | US                               | 8  | M | Disseminated | Lymph-nodes                  | -                                      | Flu-like illness Vomiting Weight loss                          | Ab Detection (CF + ID) | Serum            | No treatment      | Improved Oesophageal diverticulum due to extensive lymphadenopathy |
|    | US                               | 10 | M | Disseminated | Lymph-nodes                  | Not Specified                          | Cough Fatigue Weight loss Chest Pain Dysphagia Lymphadenopathy | Ab Detection (CF)      | Serum            | Itra              | Cure                                                               |
|    | US                               | 14 | M | Disseminated | Lymph-nodes Lung             | -                                      | Dysphagia Night Sweats Cough                                   | Ab Detection (CF+ID)   | Serum            | Itra              | Cure                                                               |
| 74 | US                               | 17 | F | Disseminated | Lung Bone                    | Juvenile RA                            | Cough Fever                                                    | Ag Detection           | Urine            | AmB + Itra        | Cure                                                               |

|    |          |     |   |              |                                                      |                         |                                                                                                                           |                                           |                      |               |                      |
|----|----------|-----|---|--------------|------------------------------------------------------|-------------------------|---------------------------------------------------------------------------------------------------------------------------|-------------------------------------------|----------------------|---------------|----------------------|
|    |          |     |   |              | marrow                                               |                         | Nausea<br>Vomiting<br>SOB                                                                                                 | Ab Detection (ID +<br>CF)                 | Serum                |               |                      |
| 75 | US       | 5m  | F | Disseminated | Bone<br>marrow                                       | -                       | Fever<br>Diarrhoea<br>Rhinorrhoea<br>Abdominal<br>distention<br>HSM<br>Irritability                                       | Histopathology                            | Bone Marrow          | Not specified | Not specified        |
| 76 | US       | 11  | F | Disseminated | Lymph-<br>nodes                                      | -                       | Neck pain<br>Lymphadenopathy                                                                                              | Histopathology<br>Ab Detection<br>(CF+ID) | Lymph Node<br>Serum  | Itra          | Cure                 |
| 77 | Paraguay | 11m | F | Disseminated | Bone<br>Lungs                                        | -                       | Fever<br>Cough<br>Respiratory Distress<br>Anorexia<br>Weight loss<br>Arthralgia<br>Joint swelling<br>Periorbital swelling | Histopathology                            | Joint tissue         |               |                      |
| 78 | Africa   | 3   | M | Disseminated | Skin<br>Lymph-<br>nodes<br>Bone<br>marrow            | HIV                     | Skin rash<br>Lymphadenopathy<br>HSM                                                                                       | Histopathology                            | Not specified        | AmB + Itra    | Lost to Follow<br>Up |
| 79 | Panama   | 14  | F | Disseminated | Bone<br>marrow<br>CNS<br>Liver<br>Spleen<br>Pancreas | ALL<br>HIV              | “Sepsis-like-picture”                                                                                                     | Culture                                   | Blood<br>Bone marrow | AmB + Itra    | Improved             |
| 80 | US       | 6   | F | Disseminated | Bone<br>Ocular                                       | ALL<br>Chemothera<br>py | Fever<br>Malaise<br>HSM<br>Choroidal lesions on<br>fundus                                                                 | Histopathology                            | Bone Marrow          | AmB           | Cure                 |
|    |          |     |   |              |                                                      |                         |                                                                                                                           | Ag Detection                              | Urine                |               |                      |
|    |          |     |   |              |                                                      |                         |                                                                                                                           | Culture                                   | Bone Marrow<br>Blood |               |                      |
| 81 | US       | 3   | F | Pulmonary    | Lungs                                                | -                       | Fever<br>SOB<br>Malaise<br>Weight loss<br>Abdominal pain                                                                  | Ab Detection (ID<br>+CF)                  | Serum                | No treatment  | Cure                 |

*F=female, M=male, SOB = shortness of breath, Itra = itraconazole, Keto = ketoconazole, AmB = Amphotericin B, Vori = voriconazole, ID = immunodiffusion, CF = complement fixation, BAL = Broncho-alveolar lavage, d = day, m = month(s), HIV = Human Immunodeficiency Virus, Ab = Histoplasma antibody, Ag = Histoplasma antigen, ALL = Acute Lymphoblastic Leukaemia, RA = Rheumatoid Arthritis, AML = Acute Myeloid Leukaemia, GIST = Gastrointestinal stromal tumour, Tx = transplant, HIES = hyper-immunoglobulin E syndrome, SLE = systemic lupus erythematosus, EBV = Epstein Barr Virus infection, MTB = Mycobacterium tuberculosis infection, HLH = hemophagocytic lymphohistiocytosis, HSM = hepatosplenomegaly.*
